# Supplementary material for: Improvements in Body Composition after a Proposed Anti-Inflammatory Diet Are Modified by Employment Status in Weight-Stable Patients with Rheumatoid Arthritis, a Randomized Controlled Crossover Trial
Source: MDPI journal article supplement (doi:10.3390/nu14051058), 2022-03-02
Supplement: s1 [file s1]

**Table S1.** Modelled estimates of differences in body composition, and metabolic markers hypothetically related to body composition, between intervention and control diet periods among patients with RA in the ADIRA trial <sup>1</sup>.

|                                     | All Participants (n = 42) |                         |                                |                |
|-------------------------------------|---------------------------|-------------------------|--------------------------------|----------------|
|                                     | Intervention              | Control                 | Difference between Periods     | P <sup>2</sup> |
|                                     | Mean (95% CI)             | Mean (95% CI)           | Mean (95% CI)                  |                |
| <b>Measures of body composition</b> |                           |                         |                                |                |
| Weight (kg)                         | -0.282 (-0.833, 0.269)    | 0.136 (-0.414, 0.687)   | -0.419 (-1.198, 0.361)         | 0.288          |
| BMI (kg/m <sup>2</sup> )            | -0.090 (-0.286, 0.106)    | 0.033 (-0.162, 0.229)   | -0.123 (-0.400, 0.154)         | 0.379          |
| FFM (kg)                            | 0.935 (0.278, 1.591)      | 0.778 (0.123, 1.434)    | 0.156 (-0.677, 0.989)          | 0.706          |
| FFMI (kg/m <sup>2</sup> )           | 0.324 (0.102, 0.545)      | 0.258 (0.037, 0.479)    | 0.066 (-0.212, 0.343)          | 0.635          |
| FM (kg)                             | -0.995 (-1.889, -0.101)   | -0.786 (-1.680, 0.107)  | -0.208 (-1.474, 1.057)         | 0.744          |
| FMI (kg/m <sup>2</sup> )            | -0.346 (-0.642, -0.050)   | -0.251 (-0.547, 0.044)  | -0.094 (-0.514, 0.325)         | 0.655          |
| FM (%)                              | -1.364 (-2.251, -0.476)   | -1.219 (-2.105, -0.333) | -0.144 (-1.401, 1.112)         | 0.820          |
| <b>Biomarkers</b>                   |                           |                         |                                |                |
| BCAA <sup>3</sup> (mmol/L)          | -0.016 (-0.034, 0.001)    | 0.005 (-0.013, 0.022)   | <b>-0.021 (-0.041, -0.001)</b> | <b>0.042</b>   |
| IGF-1 (µg/L)                        | -0.642 (-6.951, 5.667)    | 4.388 (-1.913, 10.689)  | -5.030 (-13.954, 3.894)        | 0.265          |

BCAA, Branched chain amino acids; BMI, Body mass index; FFM, Fat free mass; FFMI, Fat free mass index; FM, Fat mass; FMI, Fat mass index; IGF-1, Insulin-like growth factor 1.

<sup>1</sup> Participants completing at least one diet period and where measurement of body composition was possible (n = 42). RA, Rheumatoid Arthritis; ADIRA, Anti-inflammatory Diet In Rheumatoid Arthritis. Analysed by use of a linear mixed model with period, treatment, sex and baseline value as fixed effects and subject as random effect.

<sup>2</sup> Intervention – Control values.

<sup>3</sup> Leucine, isoleucine and valine combined.

**Table S2.** Baseline data of participants who completed at least one diet period, stratified by employment status.

|                                               | Not Employed<br>(n = 15) | Employed<br>(n = 27) | P                           |
|-----------------------------------------------|--------------------------|----------------------|-----------------------------|
|                                               | Median (IQR)             | Median (IQR)         |                             |
| Age (year)                                    | 70.8 (69.5, 72.6)        | 58.7 (45.9, 62.6)    | < <b>0.001</b> <sup>a</sup> |
| Disease duration (year)                       | 21 (16.3, 29.9)          | 17.7 (9.7, 20.6)     | 0.105 <sup>a</sup>          |
| Weight (kg)                                   | 75.5 (66.8, 85.35)       | 77.75 (65.7, 82.8)   | 0.810 <sup>a</sup>          |
| BMI (kg/m <sup>2</sup> )                      | 29.9 (24.8, 32.3)        | 25.1 (22.9, 27.7)    | 0.093 <sup>a</sup>          |
| FFMI (kg/m <sup>2</sup> )                     | 17.6 (15.1, 18.8)        | 17.5 (15.3, 18.4)    | 0.917 <sup>a</sup>          |
| FMI (kg/m <sup>2</sup> )                      | 11.4 (9.2, 13.2)         | 7.9 (6.3, 10.9)      | <b>0.013</b> <sup>a</sup>   |
| FM (%)                                        | 39.5 (37.0, 43.0)        | 34.0 (27.6, 40.1)    | <b>0.011</b> <sup>a</sup>   |
| Waist-Hip ratio                               | 0.83 (0.80, 0.88)        | 0.85 (0.79, 0.92)    | 0.736 <sup>a</sup>          |
| DAS28                                         | 3.71 (3.11, 4.66)        | 3.37 (3.01, 4.65)    | 0.697 <sup>a</sup>          |
| Erythrocyte Sedimentation Rate (mm/h)         | 20 (11, 29)              | 16 (9, 24)           | 0.352 <sup>a</sup>          |
| C-reactive Protein (mg/L)                     | 4 (2, 6)                 | 2 (1, 4)             | 0.070 <sup>a</sup>          |
| HAQ                                           | 0.88 (0.38, 1.25)        | 0.38 (0.13, 1.13)    | 0.104 <sup>a</sup>          |
| Albumin (g/L)                                 | 37 (36, 39)              | 39 (38, 42)          | 0.063 <sup>a</sup>          |
| IGF-1 (μg/L)                                  | 98 (80, 135)             | 121 (88, 160)        | 0.152 <sup>a</sup>          |
| <b>Dietary intake</b>                         |                          |                      |                             |
| NRF11.3                                       | 7.1 (6.2, 8.5)           | 6.0 (4.7, 7.4)       | <b>0.008</b> <sup>a</sup>   |
| Dietary Quality Index                         | 7 (6, 8)                 | 6 (5, 7)             | 0.169 <sup>a</sup>          |
| Energy (kcal)                                 | 1660 (1200, 2010)        | 1930 (1540, 2240)    | 0.174 <sup>a</sup>          |
| Protein (E%)                                  | 15.5 (14.8, 19.8)        | 15.4 (13.6, 16.5)    | 0.420 <sup>a</sup>          |
| Carbohydrate (E%)<br>(including fiber)        | 44.1 (40.9, 51.7)        | 42.2 (38.0, 47.7)    | 0.362 <sup>a</sup>          |
| Alcohol (E%)                                  | 0.00 (0.00, 0.78)        | 2.09 (0.00, 5.25)    | 0.117 <sup>a</sup>          |
| Fat (E%)                                      | 35.5 (33.0, 37.0)        | 37.4 (31.7, 41.7)    | 0.285 <sup>a</sup>          |
| Saturated fatty acids (E%)                    | 13.7 (12.7, 15.0)        | 15.7 (12.5, 17.2)    | 0.310 <sup>a</sup>          |
| Monounsaturated fatty acids (E%)              | 11.7 (11.0, 13.4)        | 13.0 (11.2, 16.5)    | 0.136 <sup>a</sup>          |
| Polyunsaturated fatty acids (E%)              | 5.4 (5.2, 7.8)           | 5.0 (4.1, 7.4)       | 0.262 <sup>a</sup>          |
| Marine omega-3 fatty acids <sup>1</sup> (E%)  | 0.32 (0.09, 0.96)        | 0.09 (0.06, 0.48)    | <b>0.042</b> <sup>a</sup>   |
| Protein (g/kg bodyweight/day)                 | 0.88 (0.66, 1.09)        | 0.9 (0.82, 1.2)      | 0.499 <sup>a</sup>          |
| Protein (g/day)                               | 66 (54, 74)              | 70 (56, 84)          | 0.402 <sup>a</sup>          |
| Fiber (g/day)                                 | 18 (15, 21)              | 18 (14, 21)          | 0.626 <sup>a</sup>          |
| Meal frequency (meals per day > 25 kcal)      | 5.0 (4.0, 5.3)           | 5.0 (4.0, 5.3)       | 0.891 <sup>a</sup>          |
|                                               | <b>n (%)</b>             | <b>n (%)</b>         |                             |
| <b>Medication</b>                             |                          |                      |                             |
| bDMARD usage                                  | 5 (33.3)                 | 12 (44)              | 0.531 <sup>b</sup>          |
| csDMARD usage                                 | 8 (53.5)                 | 24 (89)              | <b>0.020</b> <sup>b</sup>   |
| <b>Measures of rheumatoid cachexia</b>        |                          |                      |                             |
| Engvall <sup>2</sup>                          | 2 (13)                   | 5 (19)               | 1.000 <sup>b</sup>          |
| Elkan <sup>3</sup>                            | 2 (13)                   | 10 (37)              | 0.158 <sup>b</sup>          |
| High FMI <sup>4</sup>                         | 9 (60)                   | 14 (52)              | 0.750 <sup>b</sup>          |
| Low FFMI <sup>5</sup>                         | 4 (27)                   | 11 (41)              | 0.506 <sup>b</sup>          |
| Low FFMI & high FMI <sup>6</sup>              | 1 (7)                    | 8 (30)               | 0.123 <sup>b</sup>          |
| <b>Sex</b>                                    |                          |                      |                             |
| Female                                        | 15 (100)                 | 19 (70)              | <b>0.035</b> <sup>b</sup>   |
| <b>Parental origin</b>                        |                          |                      |                             |
| Europe                                        | 13 (87)                  | 26 (96)              | 0.439 <sup>b</sup>          |
| Africa                                        | 1 (7)                    | 0 (0)                |                             |
| Asia                                          | 1 (7)                    | 1 (4)                |                             |
| <b>Smokers</b>                                | 0 (0)                    | 2 (7)                | 0.530 <sup>b</sup>          |
| <b>Educational level</b>                      |                          |                      |                             |
| Junior high school                            | 3 (20)                   | 2 (7)                | 0.432 <sup>b</sup>          |
| 2 year senior high school                     | 4 (27)                   | 4 (15)               |                             |
| ≥3 year senior high school                    | 2 (13)                   | 4 (15)               |                             |
| College or university                         | 6 (40)                   | 17 (63)              |                             |
| <b>Physical activity during everyday life</b> |                          |                      |                             |
| Light                                         | 1 (7)                    | 4 (15)               | 0.519 <sup>b</sup>          |
| Light but partly active                       | 6 (40)                   | 8 (30)               |                             |
| Light and active                              | 6 (40)                   | 7 (26)               |                             |
| Sometimes physically heavy                    | 2 (13)                   | 8 (30)               |                             |
| Physically heavy most of the time             | 0 (0)                    | 0 (0)                |                             |
| <b>Intentional physical exercise</b>          |                          |                      |                             |
| Never                                         | 3 (20)                   | 3 (11)               | 0.890 <sup>b</sup>          |
| Now and then, not regularly                   | 5 (33)                   | 8 (30)               |                             |
| 1-2 times/week                                | 2 (13)                   | 7 (26)               |                             |
| 2-3 times/week                                | 3 (20)                   | 5 (19)               |                             |
| >3 times/week                                 | 2 (13)                   | 4 (15)               |                             |

bDMARD, biological disease modifying anti-rheumatic drug; BMI, Body mass index; csDMARD, conventional synthetic disease modifying anti-rheumatic drug; DAS28, Disease Activity Score 28 joints;

FFMI, Fat free mass index; FM, Fat mass; FMI, Fat mass index; HAQ, Health assessment questionnaire disability index; Insulin-like growth factor 1, IGF-1; NRF11.3, Nutrient Rich Foods index 11.3.

<sup>1</sup> docosahexaenoic, docosapentaenoic and eicosapentaenoic acid combined.

<sup>2</sup> Defined as FFMI <10<sup>th</sup> percentile and FMI >25<sup>th</sup> percentile as proposed by Engvall et al. [19].

<sup>3</sup> Defined as FFMI <25<sup>th</sup> percentile and FMI >50<sup>th</sup> percentile as proposed by Elkan et al. [20].

<sup>4</sup> Defined as FMI >75<sup>th</sup> percentile.

<sup>5</sup> Defined as FFMI <25<sup>th</sup> percentile.

<sup>6</sup> Defined as FFMI <25<sup>th</sup> and FMI >75<sup>th</sup> percentile.

Reference for body composition ranges is taken from Schutz et al. [21].

<sup>a</sup> Mann-Whitney Test using the exact *p*-value.

<sup>b</sup> Fisher's exact test.
